# Supplementary material for: Binding Sites for Acylated Trehalose Analogs of Glycolipid Ligands on an Extended Carbohydrate Recognition Domain of the Macrophage Receptor Mincle
Source: PubMed Central journal article supplement (PMC5076529; doi:10.1074/jbc.m116.749515), 2016-08-19

**Binding Sites for Acylated Trehalose Analogs of Glycolipid Ligands  
on an Extended Carbohydrate-recognition Domain  
of the Macrophage Receptor Mincle**

Hadar Feinberg, Neela D. S. Rambaruth, Sabine A. F. Jégouzo, Kristian M. Jacobsen,  
Rasmus Djurhuus, Thomas B. Poulsen, William I. Weis, Maureen E. Taylor, and Kurt  
Drickamer

**Figure S1.** Mass spectrometry of acylated trehalose derivatives.

**Figure S2.** Proton NMR spectra of acylated trehalose derivatives.

Figure S1. Mass spectrometry of di-acylated trehalose derivatives. Samples were prepared by spotting together equal volumes of matrix, 2,5-dihydroxybenzoic acid as a 10 mg/ml solution 80% methanol, and sugar derivative, dissolved at approximately 1 mg/ml in water, on a target plate. Mass spectrometry was performed on an Applied Biosystems 4800 matrix assisted-laser desorption time-of-flight mass spectrometer.

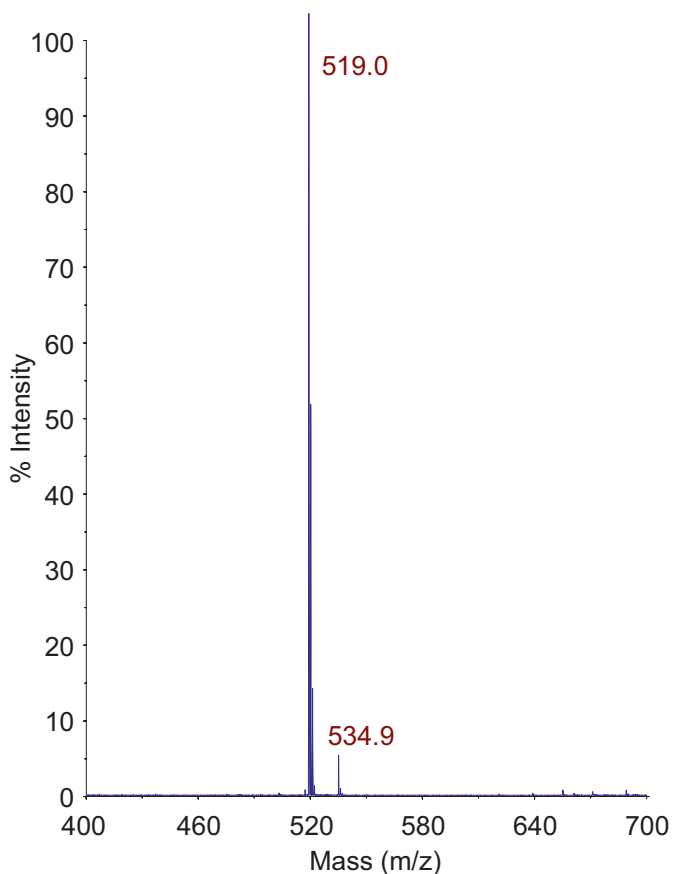

A Trehalose mono decanoate 519(Na) / 535 (K)

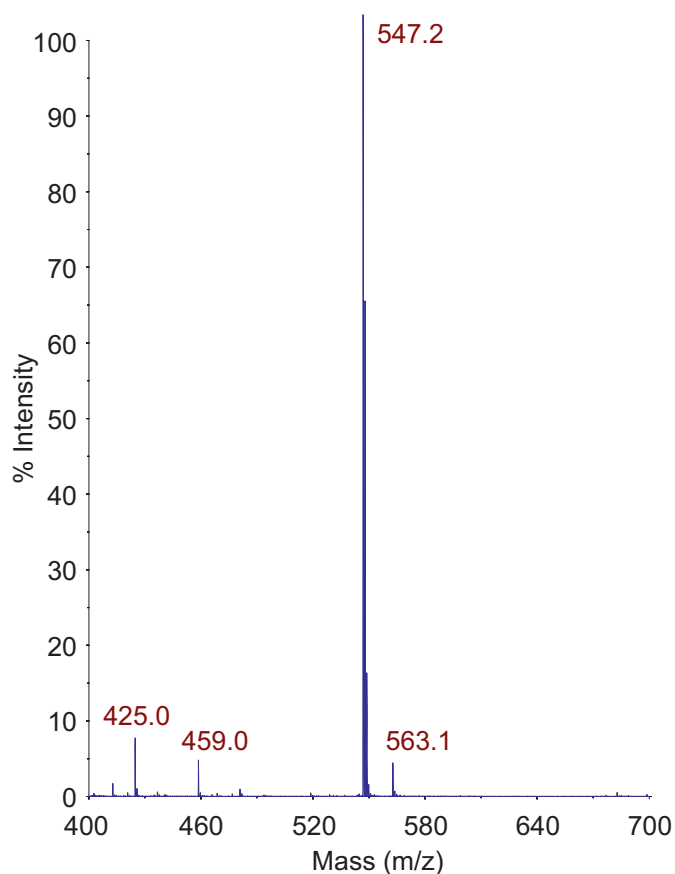

B Trehalose mono dodecanoate 547 (Na) / 563 (K)

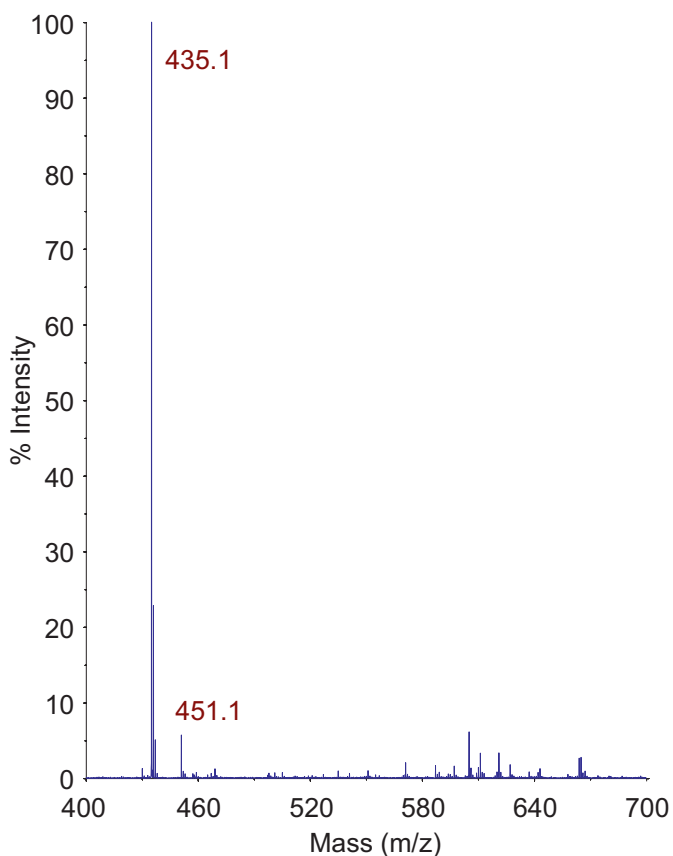

C Trehalose mono isobutyrate 435 (Na) / 451 (K)

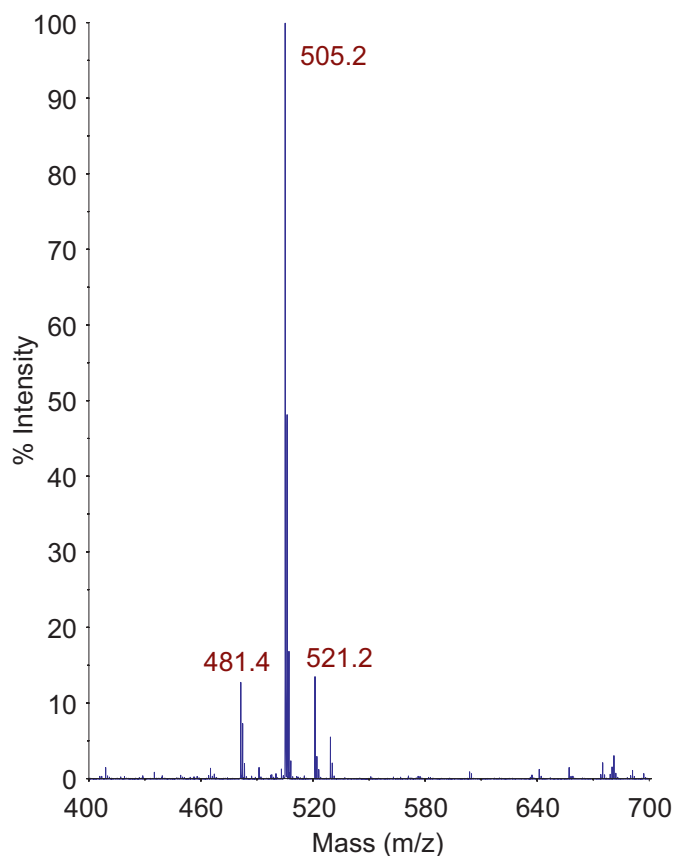

D Trehalose di isobutyrate 505 (Na) / 521(K)

**Figure S2.** Proton NMR spectra of acylated trehalose derivatives. Samples for NMR spectra, dissolved in D<sub>2</sub>O at approximately 5 mg/ml, were analyzed on a Bruker 400 MHz spectrometer. Spectra are annotated to show signals from the acyl side chain (letters A-K) and key signals from trehalose. For monoacyl derivatives, signals from the non-acylated glucose residue are denoted with primes.

A Trehalose mono decanoate

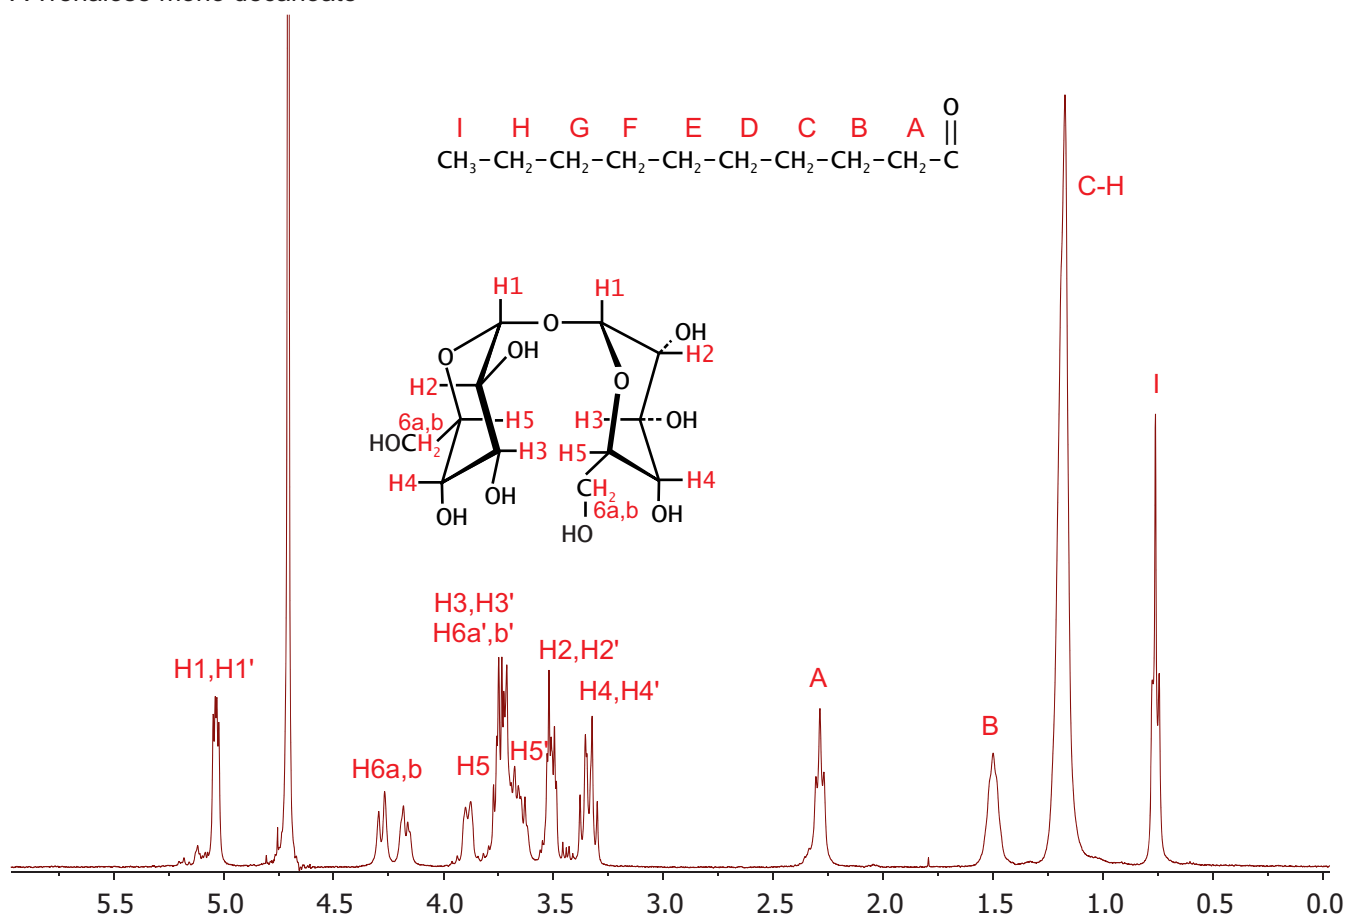

B Trehalose mono dodecanoate

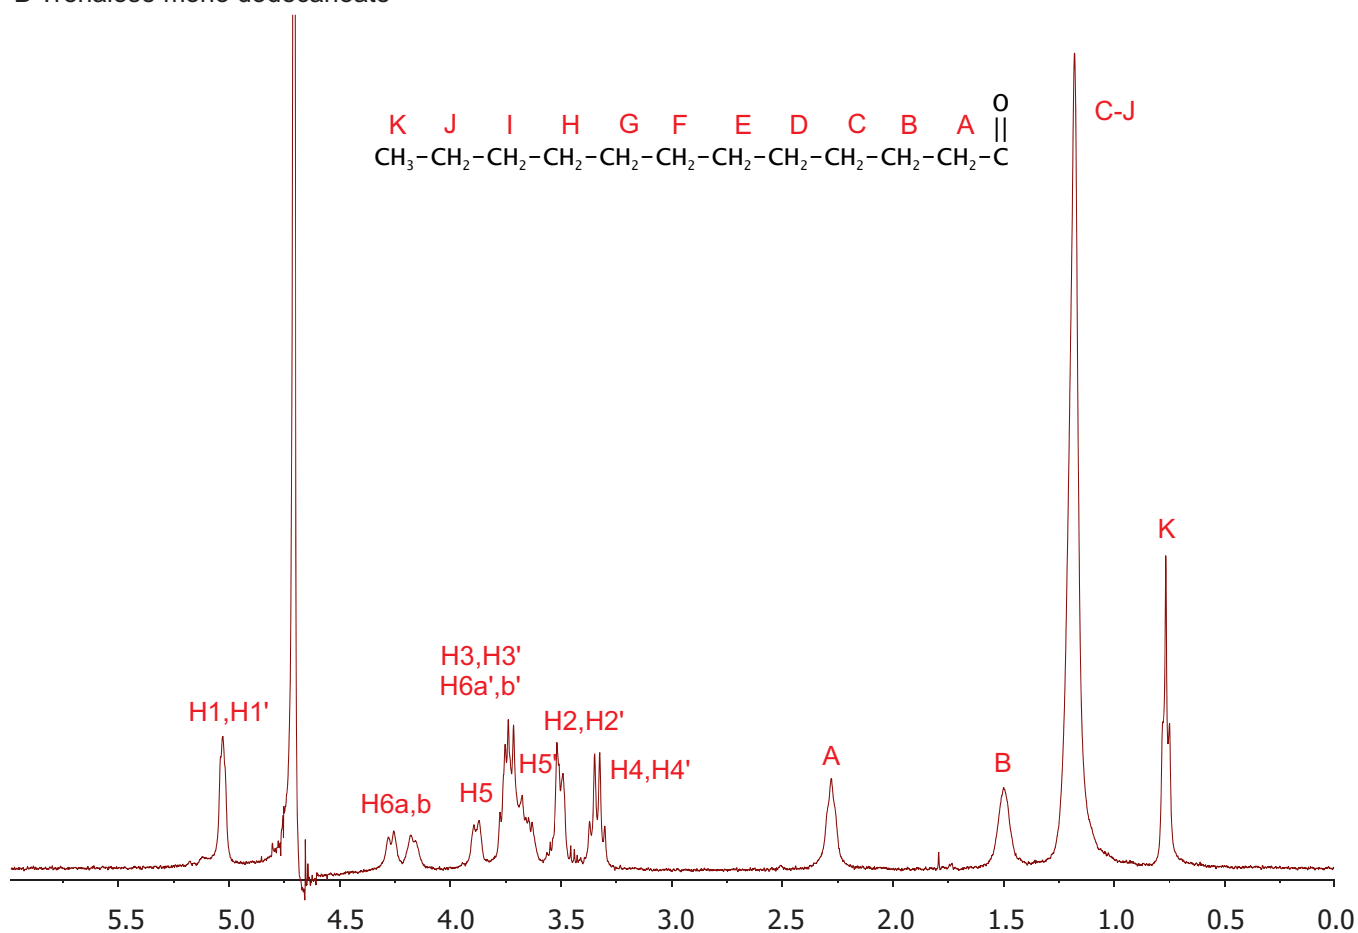

C Trehalose mono isobutyrate

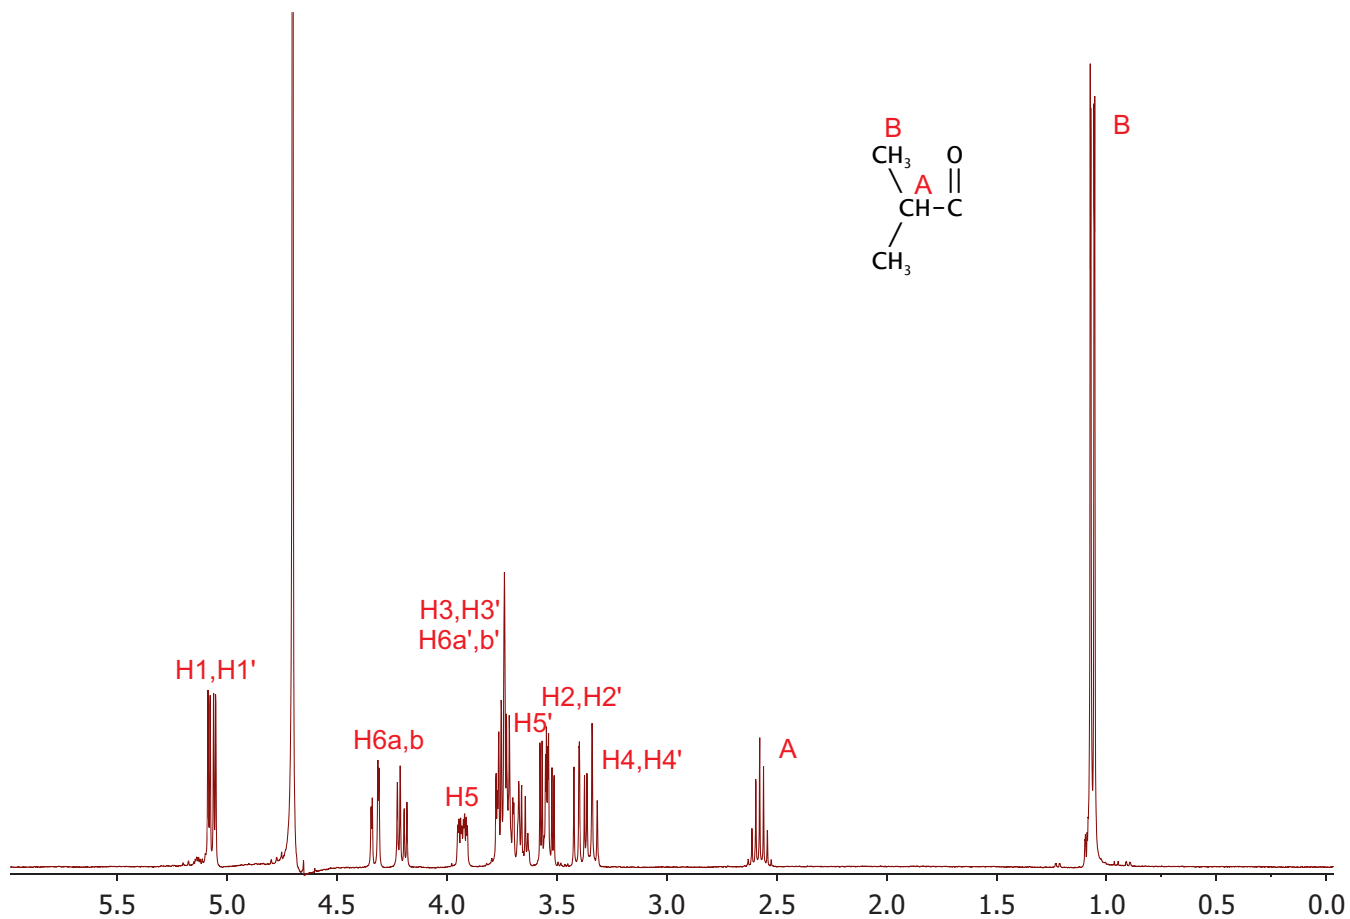

D Trehalose di isobutyrate

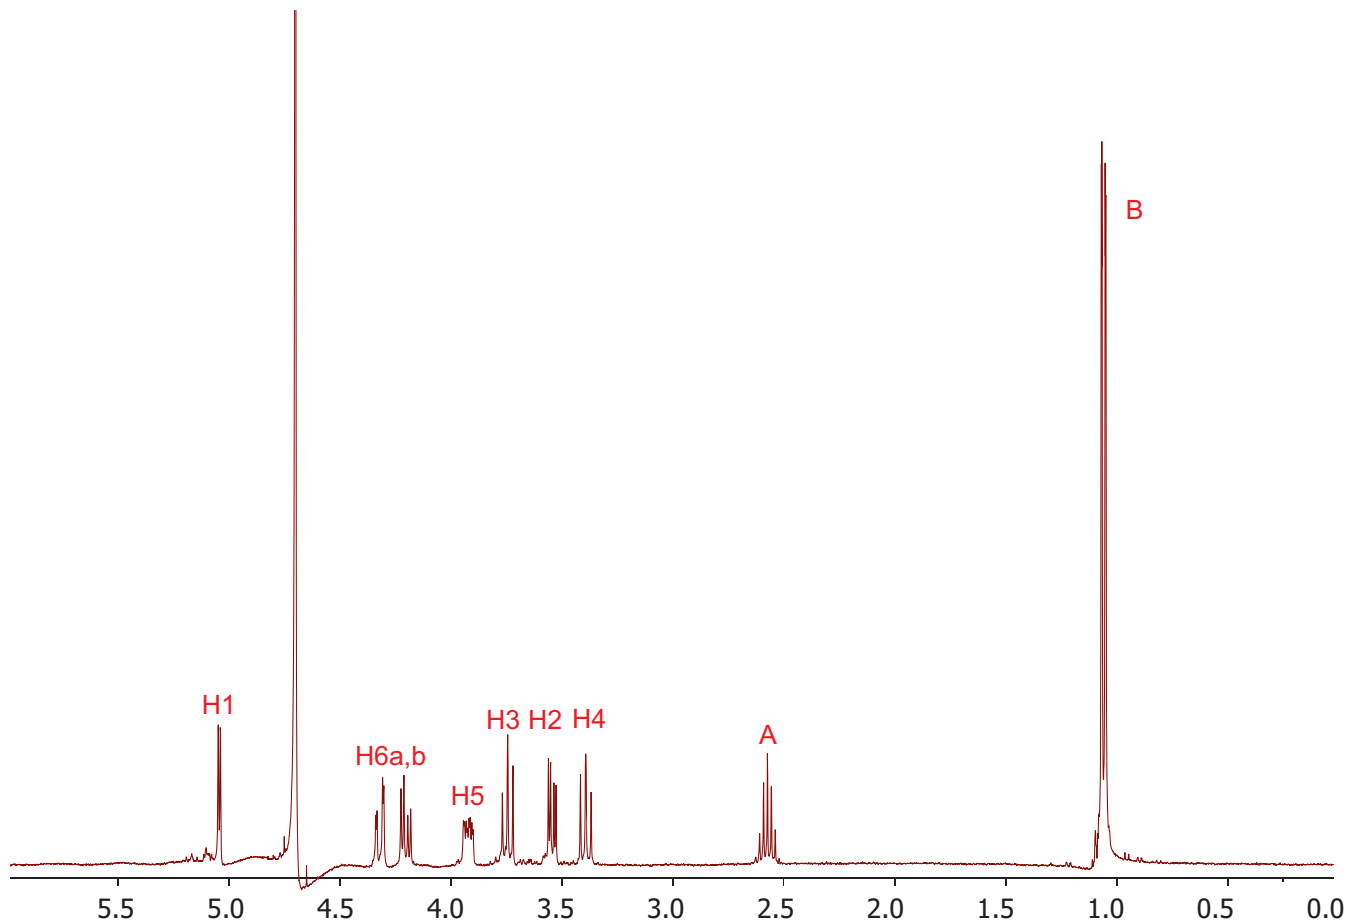

Supplement: 10.1074_M116.749515_jbc.M116.749515-1.pdf [file 10.1074_M116.749515_jbc.M116.749515-1.pdf]
